# Supplementary material for: Xylem water in riparian willow trees ( Salix alba ) reveals shallow sources of root water uptake by in situ monitoring of stable water isotopes
Source: Copernicus journal article supplement (doi:10.5194/hess-26-2073-2022), 2022-04-27
Supplement: Supplementary file 1 [file hess-26-2073-2022-supplement.pdf]

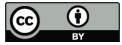

*Supplement of*

**Xylem water in riparian willow trees (*Salix alba*) reveals shallow sources of root water uptake by in situ monitoring of stable water isotopes**

**Jessica Landgraf et al.**

*Correspondence to:* Jessica Landgraf ([jessica.landgraf@igb-berlin.de](mailto:jessica.landgraf@igb-berlin.de))

The copyright of individual parts of the supplement might differ from the article licence.

# Supplementary Material

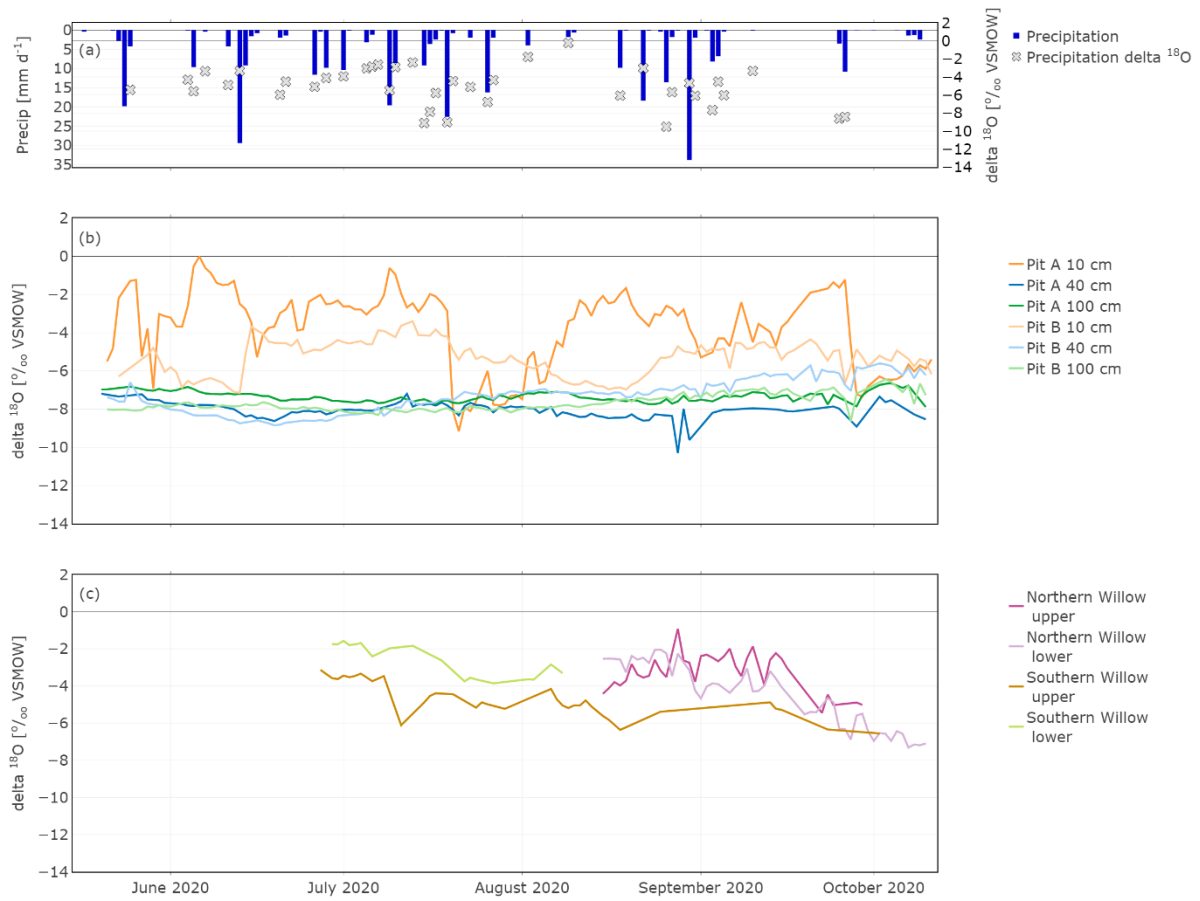

**Figure S1:** *In situ* time series of daily  $\delta^{18}\text{O}$  in: Precipitation (a), Pit A and Pit B (b), and Northern and Southern Willow (c).

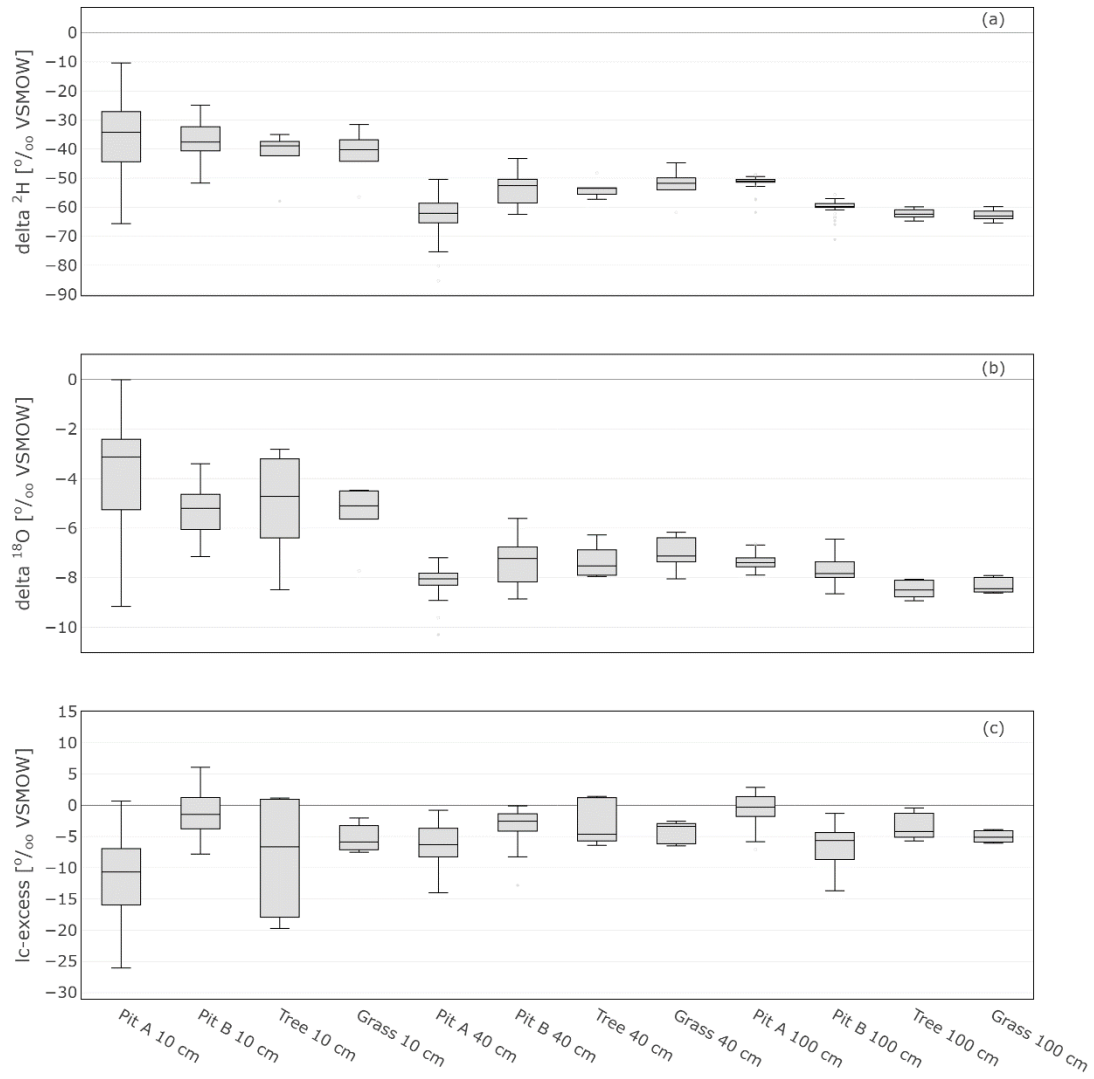

**Figure S2: Box plots showing *in situ* and bulk soil sampling results at certain depths. For comparison bulk soil sampling results were estimated via mean of the depths above (for example 10 – 20 cm and 20 – 40 cm samples to calculate the result for 40 cm).**

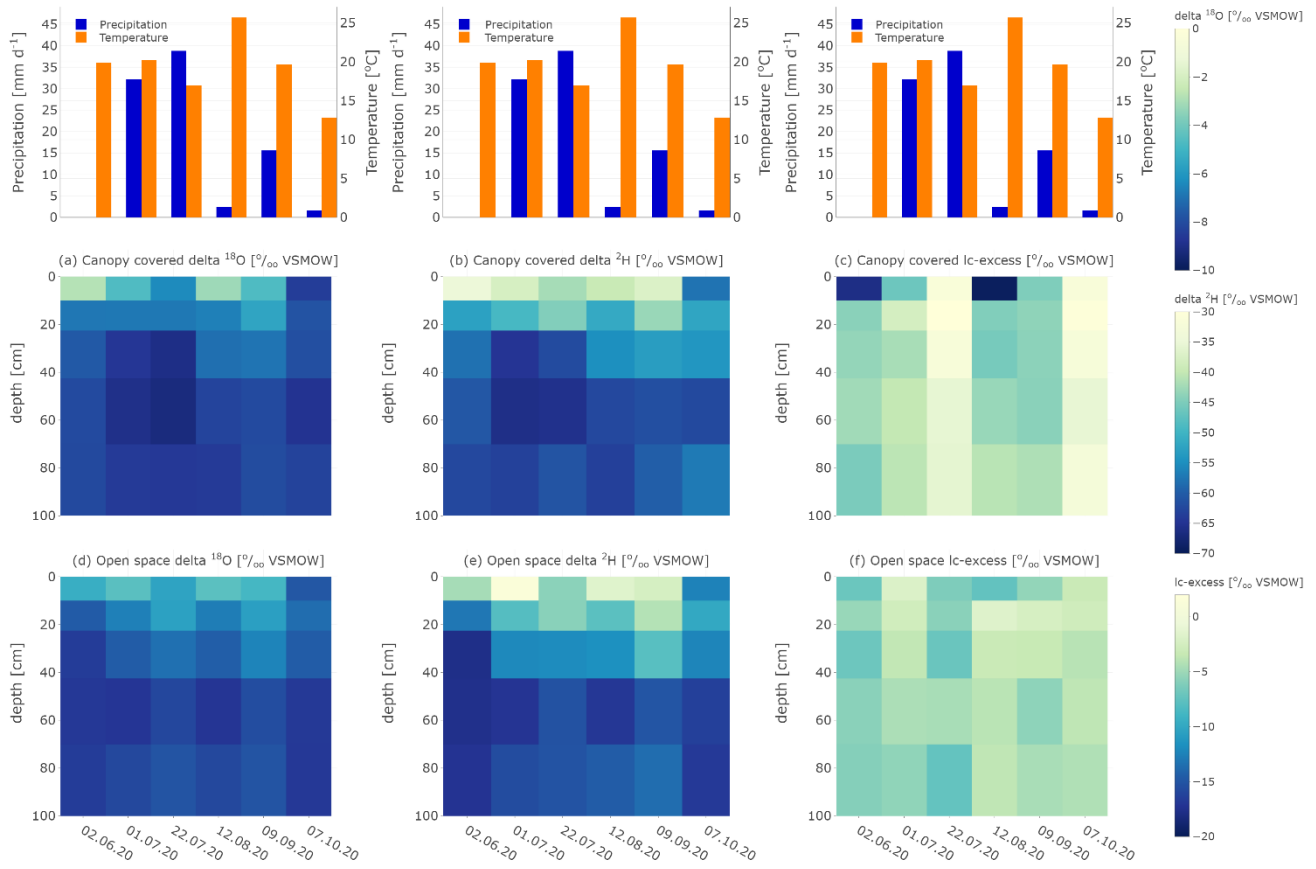

10

**Figure S3: Monthly bulk soil sampling isotopic results from two locations of the site. “Canopy covered” (a – c) is closer to Northern Willow and Pit A and “Open space” (d – f) is closer to Pit B and Southern Willow. On top of the plots is antecedent precipitation as 7d sum before sampling and the daily mean temperature.**

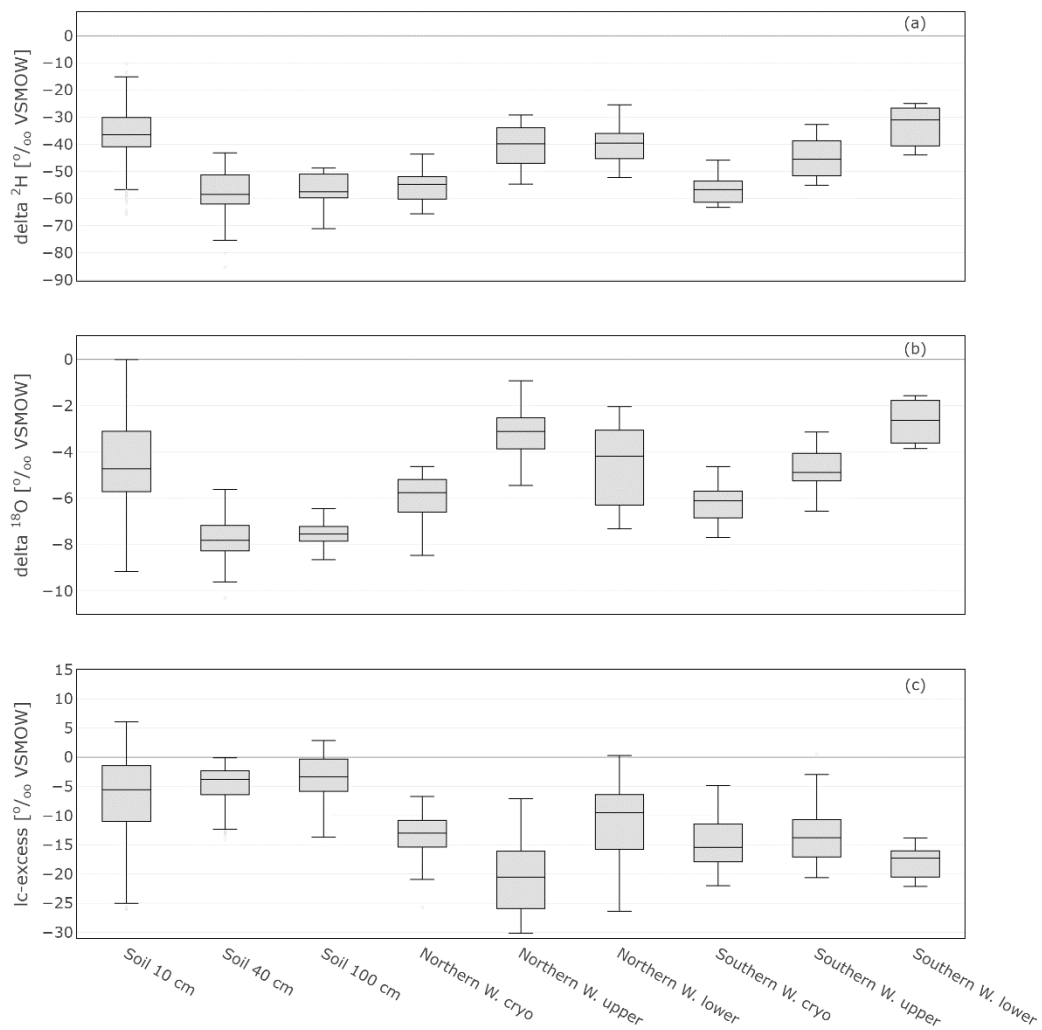

15

**Figure S4: Box plots showing daily means of *in situ* soil and xylem water isotopic composition as well as the monthly cryogenic vacuum extracted twig water isotopic composition of the two willow trees.**

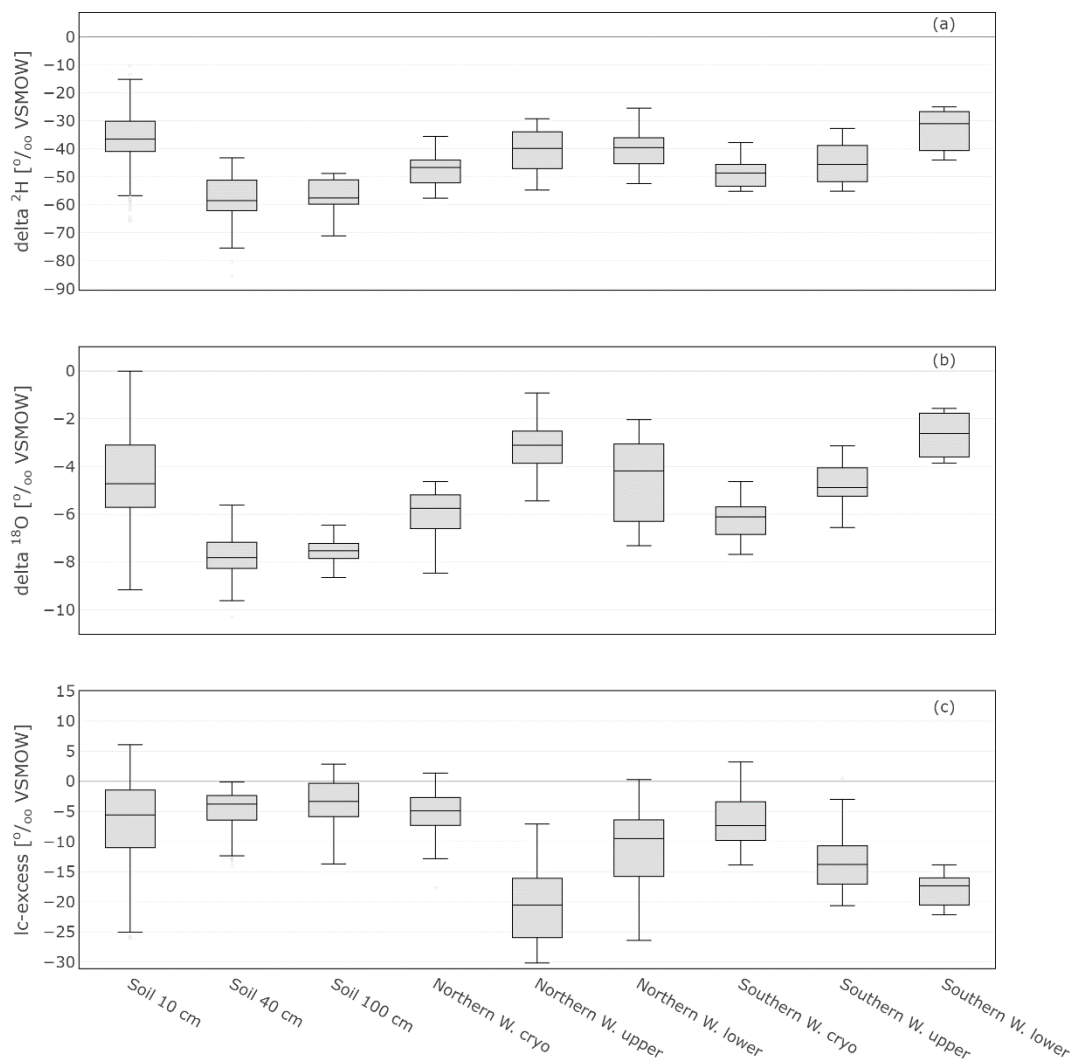

20 **Figure S5:** Box plots showing daily means of *in situ* soil and xylem water isotopic composition as well as the monthly cryogenic vacuum extracted twig water isotopic composition of the two willow trees. Cryogenic vacuum extracted water results of  $\delta^2\text{H}$  is corrected by 8.1‰ after Chen et al. (2020).

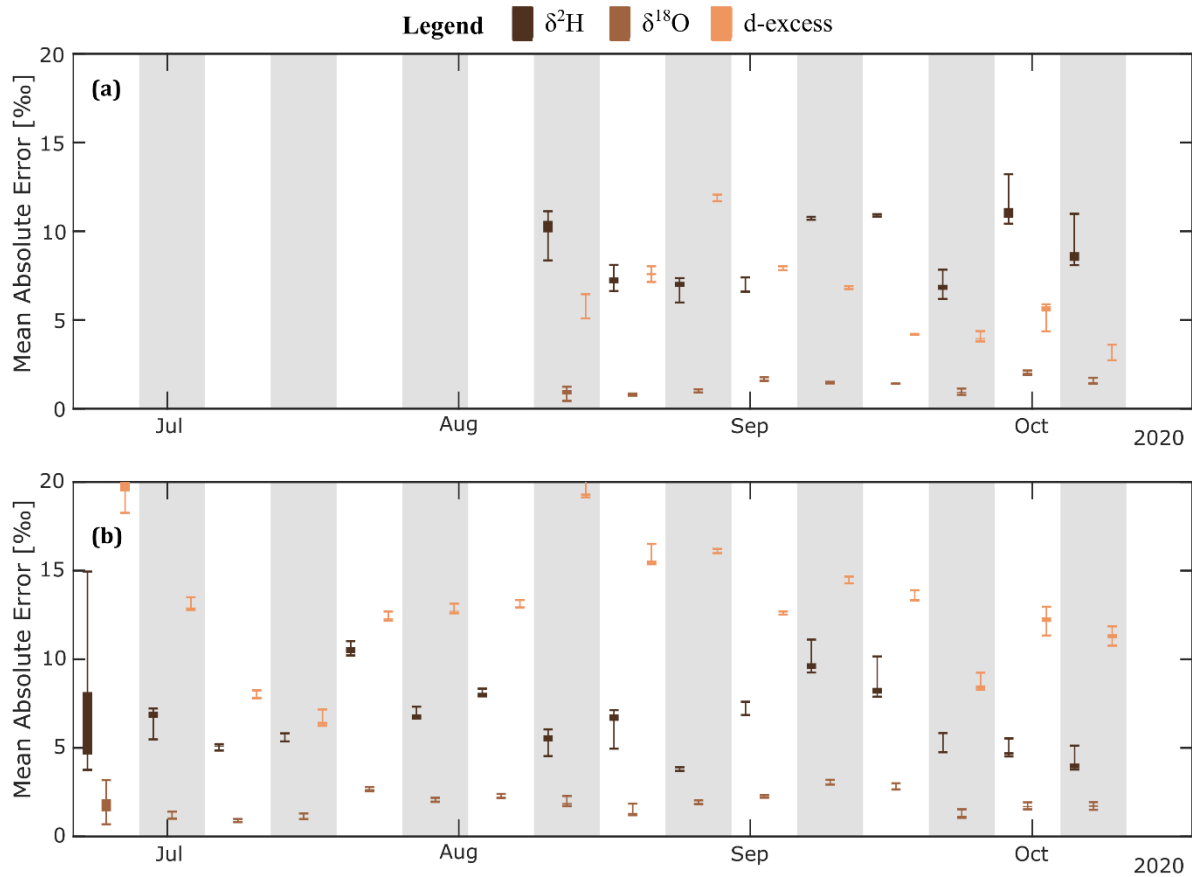

**Figure S6: Box plot of mean absolute error for each isotope and week for (a) the Northern Willow, and (b) the Southern Willow.**
